# Supplementary material for: Modulated morphologies and tunable thiol-responsive shedding of aqueous block copolymer aggregates
Source: Royal Society of Chemistry journal article supplement (doi:10.1039/c2ra21209a), 2012-01-01

## Supporting information

### Modulated morphologies and tunable thiol-responsive shedding of aqueous block copolymer aggregates

Qian Zhang, Na Re Ko, Jung Kwon Oh\*

Department of Chemistry and Biochemistry, Concordia University, 7141 Sherbrooke St. W., Montreal, Quebec, Canada H4B 1R6

Corresponding author: J. K. Oh (joh@alcor.concordia.ca)

**Figure S1.**  $^1\text{H-NMR}$  spectrum of ssBCP-1 ( $\text{PEO}_{113}\text{-SS-PS}_{163}$ ) in  $\text{CDCl}_3$ .

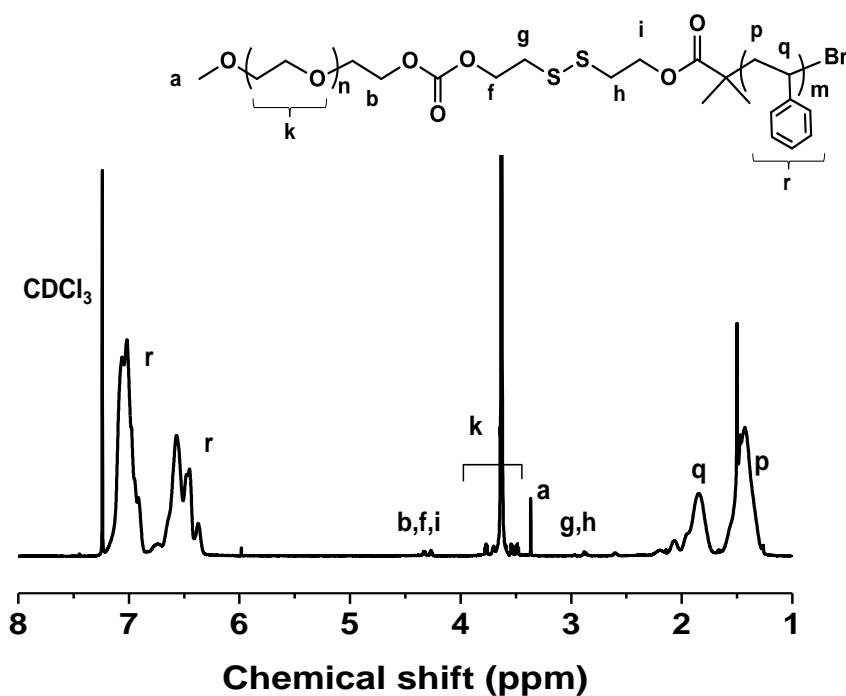

**Figure S2.** DLS diagrams of micellar aggregates in aqueous solutions prepared by dialysis method.

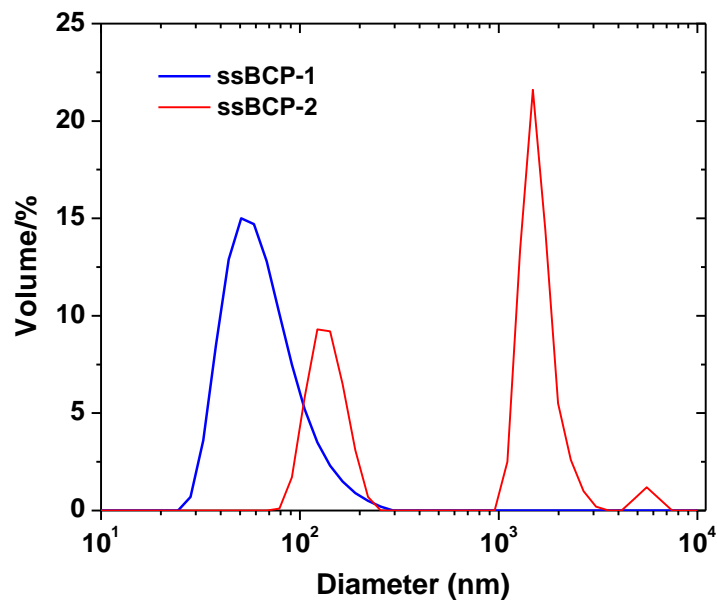

**Figure S3.** DLS diagrams of micellar aggregates in aqueous solutions prepared by solvent evaporation method.

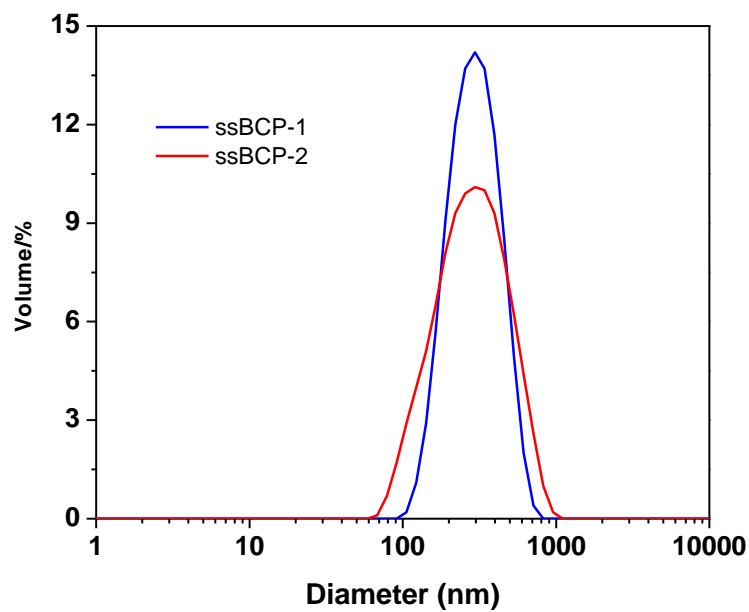

**Figure S4.** Overlaid GPC traces of spheres of ssBCP-1 and vesicles of ssBCP-2 in the presence of DTT in water after 4 (a) and 24 hrs (b).

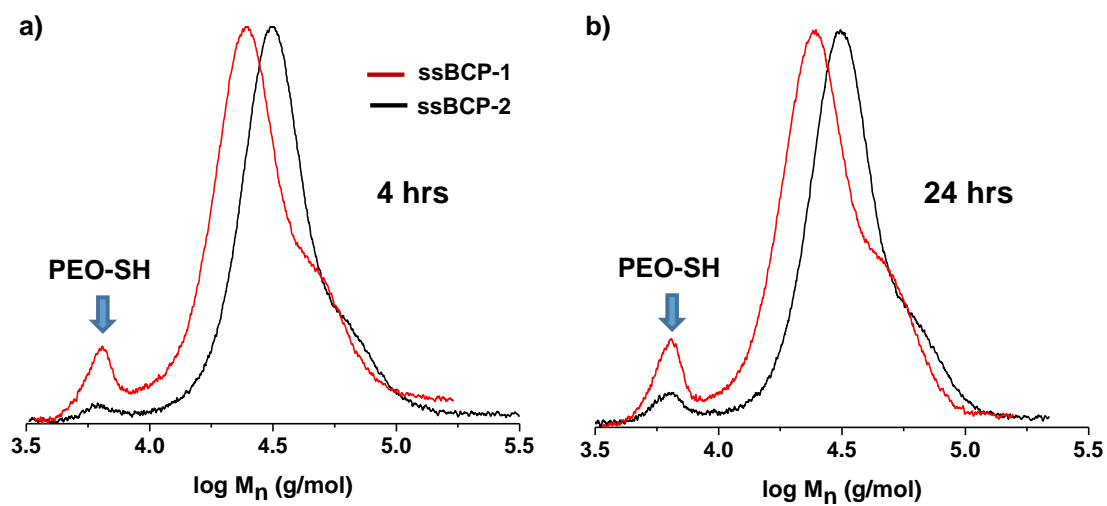

Supplement: c2ra21209a.pdf [file c2ra21209a.pdf]
